# Supplementary material for: Thermal plasma synthesis of tungsten bronze nanoparticles for near infra-red absorption applications
Source: Royal Society of Chemistry journal article supplement (doi:10.1039/c0jm02169e), 2010-01-01
Supplement: c0jm02169e.pdf [file c0jm02169e.pdf]

# Thermal Plasma Synthesis of Tungsten Bronze Nanoparticles for Near Infra-Red Absorption Applications

*Marc Mamak<sup>a</sup>, Sung Yeun Choi<sup>a\*</sup>, Urs Stadler<sup>a</sup>, Richard Dolbec<sup>b</sup>, Maher Boulos<sup>b</sup>, and Srebri Petrov<sup>c</sup>*

<sup>a</sup> Effect Materials Research, BASF Corporation

500 White Plains Rd, Tarrytown, NY, 10591, USA,

<sup>b</sup> Tekna Plasma Systems Inc., 2935, boul. Industriel, Sherbrooke, Quebec, J1L 2T9, Canada,

<sup>c</sup> Department of Chemistry, University of Toronto

80 St. George Street, Toronto, Ontario, M5S 3H6, Canada

\* Corresponding author E-mail: [sungyeun.choi@basf.com](mailto:sungyeun.choi@basf.com)

## Supplementary Information

### Experimental.

Materials Synthesis: The thermal plasma synthesis of alkali tungsten bronze nanoparticles was performed in a multi-purpose RF plasma reactor such as shown in Supporting Information Figure 1. The unit consists of a water cooled plasma torch (Model PL-50, 3 MHz, Tekna Plasma Systems Inc.), a reaction chamber, and powder collection units. A powder mixture containing a desired molar ratio of M/W was prepared from a physical mixture of ammonium paratungstate (APT, Global Tungsten & Powders Corp., -40 mesh) with an alkali metal salt such as sodium carbonate monohydrate ( $\text{Na}_2\text{CO}_3 \cdot \text{H}_2\text{O}$ , Alfa Aesar), cesium formate monohydrate ( $\text{CsCOOH} \cdot \text{H}_2\text{O}$ , Cabot Specialty Fluids), potassium carbonate ( $\text{K}_2\text{CO}_3$ , Alfa Aesar), tri-potassium citrate monohydrate ( $\text{C}_6\text{H}_5\text{K}_3\text{O}_7 \cdot \text{H}_2\text{O}$ , Alfa

Aesar) or potassium acetate ( $\text{CH}_3\text{CO}_2\text{K}$ , Alfa Aesar). The APT powder mixture was entrained in a carrier gas flow (argon, 7 slpm) with a standard powder feeder at a rate of 0.7 to 1 kg/h. The fluidized powder mixture was axially injected through a Tekna SD 260 dispersion probe at the coil center of the induction plasma torch operating at 65 kW while the sheath gas composition was held at 100 slpm Ar, 5 slpm He, and 1 slpm  $\text{H}_2$  [slpm = standard liters per minute; standard conditions for the calculation of slpm are defined as:  $T_n$  0 °C (32 °F),  $P_n$  = 1.01 bar (14.72 psi)]. The operating pressure in the reactor unit was maintained at slightly lower than atmospheric pressure (700 torr) by means of a vacuum pump. The produced tungsten bronze nanopowders are collected by a filter bag after passing a heat exchange zone.

Characterization: For powder X-ray diffraction (PXRD) analysis, the samples were gently packed into deep 1.0 mm aluminum-sample holders and the excess on the surface was cut off with an edge to minimize the expected preferred orientation. Some samples were additionally prepared from a suspension in isopropyl alcohol deposited onto a zero-background Si-plate. Due to the high linear absorption of X-rays from the tungsten bronzes, they all have a  $\mu$  of approximately  $1000 \text{ cm}^{-1}$  which means that the depth of penetration is only 1 to 4  $\mu\text{m}$ . Thus, even thin films of these materials should be considered as sufficiently thick for optimal diffraction and reliable quantitative results. The samples were run on a standard Bragg-Brentano Siemens D5000 Diffractometer system. A high-power, line-focus Cu-target was used, operating at 50kV/35mA. The data were collected on a step scan mode with step size  $0.02^\circ$  2-theta and counting time of 2.5 seconds per step. The data processing was done by *Diffraction Plus™* software *Eva™* v. 8.0. The primary phase identification was performed using *SearchMatch™* and PDF-2 reference database<sup>1</sup> where some of the possible  $\text{M}_x\text{WO}_3$  compounds were found. The missing references were created as simulated x-ray patterns from single crystal structural data retrieved from ICSD database.<sup>2</sup> The profile fitting and Rietveld analyses were carried out by Bruker's *AXS Topas™* profile fitting software v. 2.1. Field emission scanning electron microscopy (FE-SEM) was performed using a Hitachi S-5200 in-lens SEM. Samples were prepared from isopropanol dispersions which were deposited onto a 200 mesh copper grid with formvar carbon

support film. For UV-vis-NIR spectroscopy, the tungsten bronze nanopowders were first mixed with KBr at a loading of 0.25 wt.-% then finely ground with mortar and pestle. KBr pellets were fabricated using a FTIR die and Carver® press at 15000 pounds for 1 minute. Blank KBr pellets were fabricated for the collection of background spectra. Transmission spectra were collected on a Cary 5000 UV-vis-NIR spectrophotometer. All the spectra reported here are the absorption spectra with background correction selected. The spectra were collected from 2500 nm to 200 nm with a scan rate of 600 nm per min. BET surface area measurements were performed on a Quantachrome Nova 1000. Samples were outgassed at 110°C for 1h. A 5 point BET was collected.

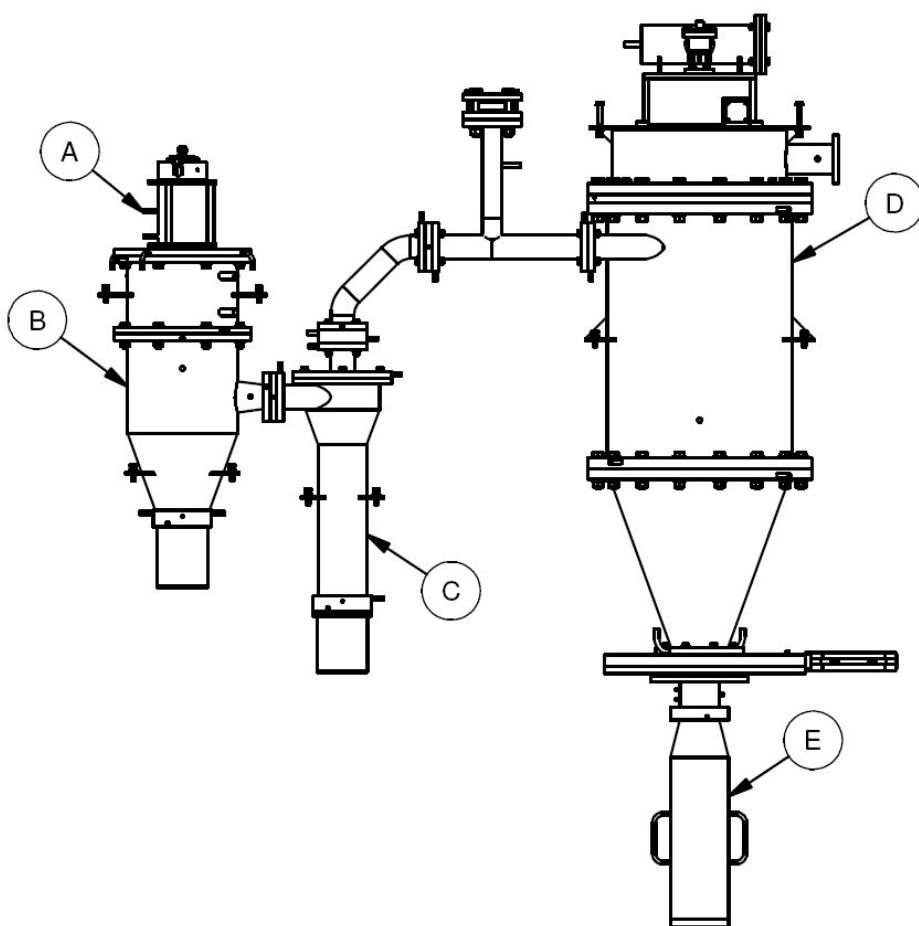

**Fig. S1.** ICP reactor design for the synthesis of tungsten bronze nanoparticles. The labeled components are as follows: A) TEKNA PL-50 plasma torch, B) reactor, C) cyclone, D) filter baghouse, and E) nanopowder collection canister.

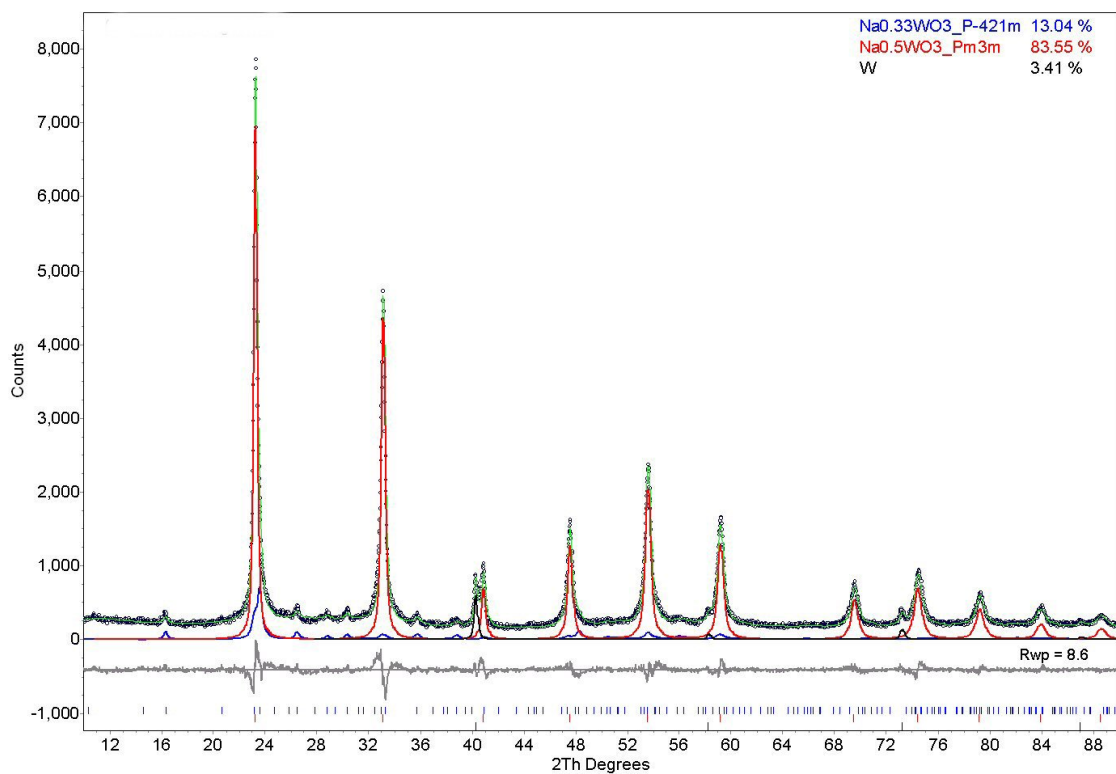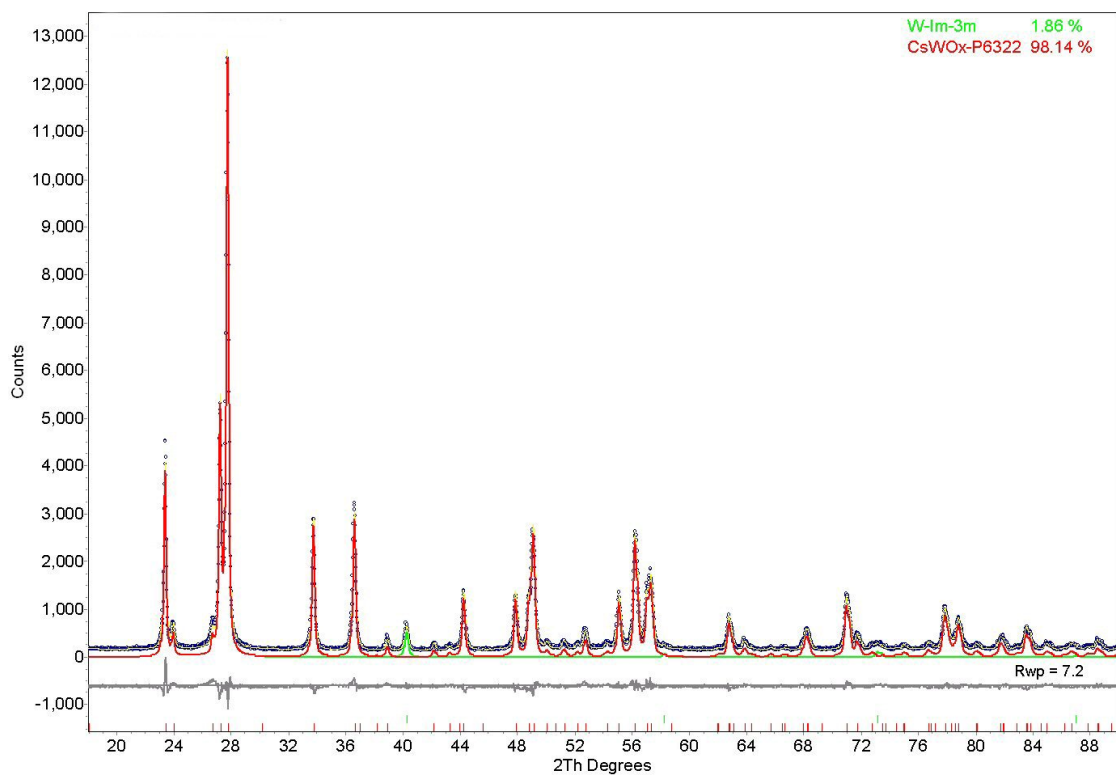

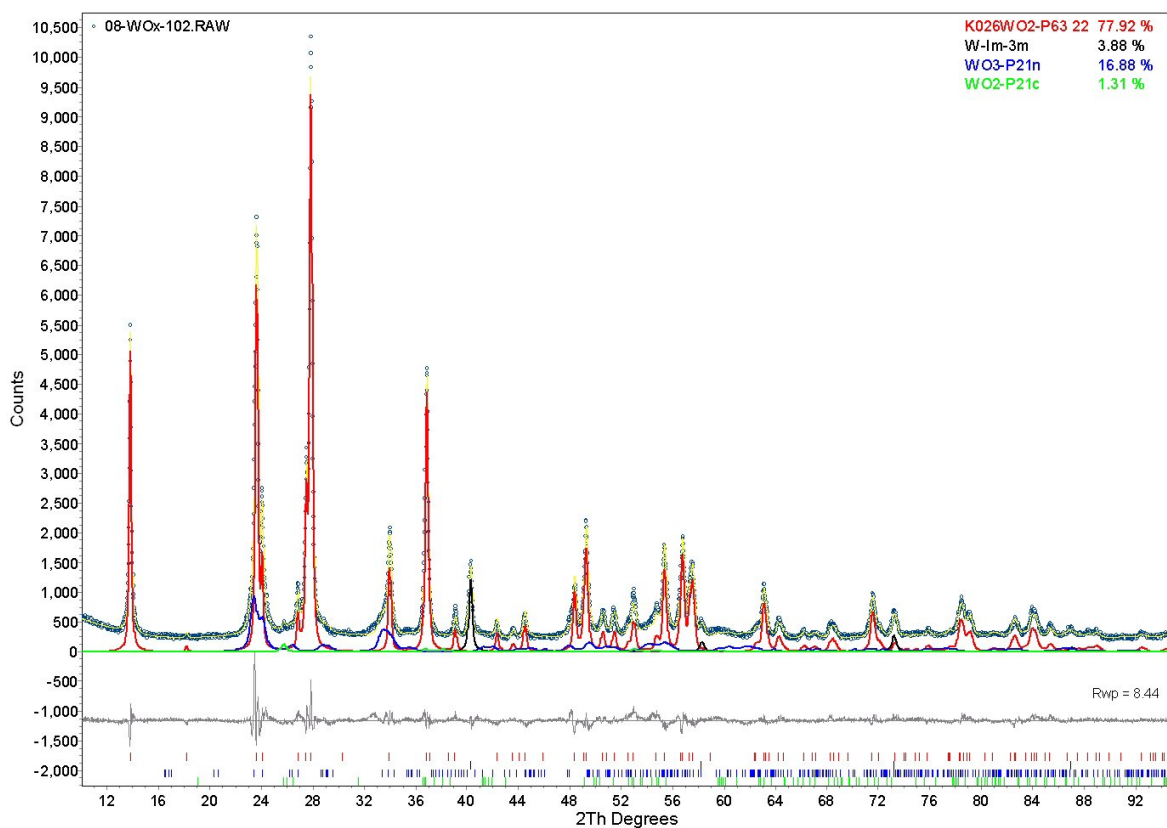

**Fig. S2.** Rietveld refinement plots for  $\text{Na}_{0.38}\text{WO}_3$  (top) and  $\text{Cs}_{0.2}\text{WO}_3$  (middle) and  $\text{K}_{0.26}\text{WO}_3$  (bottom) produced by thermal plasma synthesis.

| Material | M/W ratio | Space Group        | BET SA ( $\text{m}^2/\text{g}$ ) | Particle size (nm) | $L_v$ (nm) |
|----------|-----------|--------------------|----------------------------------|--------------------|------------|
| NIR-Na   | 0.33      | Pm3m               | 8.5                              | 93                 | 72         |
| NIR-K    | 0.26      | P6 <sub>3</sub> 22 | 16.5                             | 49                 | 43         |
| NIR-Cs   | 0.30      | P6 <sub>3</sub> 22 | 15                               | 48                 | 39         |

**Table S1.** Material properties of thermal plasma synthesized tungsten bronze nanopowders.

#### REFERENCES.

1. Powder Diffraction Reference Database, Release 2001, ICDD, Southmore, Pennsylvania.
2. Inorganic Crystal Structure Database, 2005-2, Karlsruhe, Germany.
